# Supplementary material
Source: PubMed Central journal article supplement (PMC7987929)
Supplement: mmc1.pdf [file mmc1.pdf]

# INDIVIDUAL CONFLICT OF INTEREST STATEMENT

## *American Association of Hip and Knee Surgeons*

(Adopted from the American Academy of Orthopaedic Surgeons disclosure statement)

The following form **must be filled out completely and submitted by each author (example, 6 authors, 6 forms).**  
**All items require a response. If there is no relevant disclosure for a given item, enter "None."**

---

**Manuscript Title: Effect of the COVID-19 Pandemic on Electively Scheduled Hip and Knee Arthroplasty Patients in the US – a brief update**

1. Royalties from a company or supplier (The following conflicts were disclosed)  
Total Joint Orthopedics
  
2. Speakers bureau/paid presentations for a company or supplier (The following conflicts were disclosed)  
None
  
- 3A. Paid employee for a company or supplier (The following conflicts were disclosed)  
None
  
- 3B. Paid consultant for a company or supplier (The following conflicts were disclosed)  
Total Joint Orthopedics  
DePuy  
Xenex
  
- 3C. Unpaid consultants for a company or supplier (The following conflicts were disclosed)  
None
  
4. Stock or stock options in a company or supplier (The following conflicts were disclosed)  
Xenex
  
5. Research support from a company or supplier as a Principal Investigator (The following conflicts were disclosed)  
Porter Adventist Hospital  
DePuy
  
6. Other financial or material support from a company or supplier (The following conflicts were disclosed)  
None
  
7. Royalties, financial or material support from publishers (The following conflicts were disclosed)  
None
  
8. Medical/Orthopaedic publications editorial/governing board (The following conflicts were disclosed)  
None
  
9. Board member/committee appointments for a society (The following conflicts were disclosed)  
AAHKS, Research Committee Member

**Each author must sign AND print or type his/her name, date and submit a separate form**

In addition, one BLINDED Conflict of Interest form (no author names used) should be submitted per manuscript with all author disclosures.

Jason M. Jennings



8/2/2020

---

Author Name (Print or Type)

Author Signature

Date
