# Supplementary material
Source: PubMed Central journal article supplement (PMC7987929)
Supplement: mmc12.pdf [file mmc12.pdf]

# INDIVIDUAL CONFLICT OF INTEREST STATEMENT

## *American Association of Hip and Knee Surgeons*

(Adopted from the American Academy of Orthopaedic Surgeons disclosure statement)

The following form **must be filled out completely and submitted by each author (example, 6 authors, 6 forms).**  
**All items require a response. If there is no relevant disclosure for a given item, enter "None."**

### Manuscript Title

1. Royalties from a company or supplier (The following conflicts were disclosed)  
*None*
2. Speakers bureau/paid presentations for a company or supplier (The following conflicts were disclosed)  
*None*
- 3A. Paid employee for a company or supplier (The following conflicts were disclosed)  
*None*
- 3B. Paid consultant for a company or supplier (The following conflicts were disclosed)  
*None*
- 3C. Unpaid consultants for a company or supplier (The following conflicts were disclosed)  
*None*
4. Stock or stock options in a company or supplier (The following conflicts were disclosed)  
*FD Surgical*
5. Research support from a company or supplier as a Principal Investigator (The following conflicts were disclosed)  
*None*
6. Other financial or material support from a company or supplier (The following conflicts were disclosed)  
*None*
7. Royalties, financial or material support from publishers (The following conflicts were disclosed)  
*None*
8. Medical/Orthopaedic publications editorial/governing board (The following conflicts were disclosed)  
*None*
9. Board member/committee appointments for a society (The following conflicts were disclosed)  
*None*

**Each author must sign AND print or type his/her name, date and submit a separate form**

In addition, one BLINDED Conflict of Interest form (no author names used) should be submitted per manuscript with all author disclosures.

*Michael B...*  
Author Name (Print or Type) *[Signature]* Author Signature \_\_\_\_\_ Date \_\_\_\_\_
